1           **Metagenomic analysis uncovers strong relationship between**  
2 **periodontal pathogens and vascular dysfunction in American Indian**  
3 **population**  
4

5 Prathik K Vijay Kumar<sup>1,2</sup>, Roberta A. Gottlieb<sup>3</sup>, Suzanne Lindsay<sup>4</sup>, Nicole Delange<sup>5</sup>, Tanya E.  
6 Penn<sup>5</sup>, Dan Calac<sup>6</sup>, Scott T. Kelley<sup>1,2\*</sup>  
7  
8  
9

10 <sup>1</sup> San Diego State University, Department of Bioinformatics and Medical Informatics, San Diego,  
11 California, United States of America

12 <sup>2</sup> San Diego State University, Department of Biology, San Diego, California, United States of  
13 America

14 <sup>3</sup> Cedars-Sinai Heart Institute, 127 S. San Vicente Blvd, AHSP9105, Los Angeles, California,  
15 United States of America

16 <sup>4</sup> Institute for Public Health, San Diego State University, GSPH Division of Epidemiology and  
17 Biostatistics, San Diego, California, United States of America

18 <sup>5</sup> Institute for Public Health, San Diego State University, San Diego, California, United States of  
19 America  
20

21 <sup>6</sup> Southern California American Indian Health Center, San Diego, California, United States of  
22 America  
23

24 Key Words: AI/AN, Periodontal Disease, Cardiovascular Disease, IL-1beta, IL-1  $\beta$ , Vascular  
25 function, SNP

26 Short Title: Periodontal disease and vascular dysfunction

27 \* Corresponding author

28 Email: [skelley@mail.sdsu.edu](mailto:skelley@mail.sdsu.edu)  
29

## 30 Abstract

31 Periodontal disease (PD) is a well-known risk factor for cardiovascular disease (CVD) but the  
32 casual relationship is unclear. American Indians/Alaskan Natives (AI/AN) have high rate of both  
33 PD and CVD and a better understanding of how PD might affect heart health would be  
34 particularly helpful in this population. In this study, we sequenced the bacterial biofilms of  
35 periodontal (gum) pockets and used metagenomic sequencing and vascular health measurements  
36 (immune cytokine profiles and vascular flow) to determine the relationship of microbial  
37 pathogens and CVD. Twelve subjects were sequenced before and after standard periodontal  
38 treatment. Other measures taken before and after treatment included a full dental screening;  
39 serum concentration of key immune cytokines from blood samples; lipid profiles from fasting  
40 venous blood; and plasma glucose concentrations. The non-invasive Laser Doppler Fluxmetry  
41 (LDF) procedure was conducted to measure the microvascular vasodilation. We found highly  
42 significant relationships between the total abundance of 4 periodontal pathogens,  
43 *Porphyromonas gingivalis*, *Fusobacterium nucleatum*, *Tannerella forsythia* and *Treponema*  
44 *denticola*, and the inflammatory cytokine interleukin 1 beta (IL-1 $\beta$ ) ( $r=0.63$ ;  $p=0.009$ ) as well as  
45 with vascular flow post sodium nitroprusside (SNP) treatment ( $r=p=0.006$ ). Two bacterial  
46 species that correlated most with IL-1 $\beta$  were *F. nucleatum* and *P. gingivalis*. IL-1 $\beta$  has been  
47 strongly implicated as a causal factor in atherosclerosis and in periodontal bone loss. To our  
48 knowledge, this is the first direct link between abundance of specific periodontal pathogens and  
49 cardiovascular disease in humans, and suggests that these pathogens could be used as warning  
50 signs for cardiovascular risk.

51  
52  
53  
54  
55  
56  
57  
58  
59

## 60 Introduction

61  
62 Periodontitis (gum disease) is a polymicrobial, chronic condition inflammatory disease of the  
63 gingiva characterized by a progressive breakdown of gum tissue. If left untreated, periodontitis  
64 results in a deterioration of the alveolar bone resulting in loosening and eventual loss of the tooth  
65 (1,2). Oral microbiologists have determined that periodontal disease (PD) is caused by complex  
66 biofilms that form at the tooth-gum interface. As the disease progresses, the biofilms become  
67 more complex with the early colonizers being mostly commensal bacteria (e.g., *Streptococcus*  
68 and *Veillonella*), and the later colonizers tending to be more pathogenic (e.g., *Porphyromonas*  
69 and *Treponema*) (2-4).

70 Numerous studies have established risk factors for coronary artery disease including  
71 smoking, obesity, diabetes, hypertension and hypercholesterolemia (5). In addition, a number of  
72 studies over the past two decades have suggested an association between periodontitis infection  
73 and cardiovascular disease (CVD) (6-9). A meta-analysis found a 44% increase in risk of future  
74 cardiovascular disease in adults under age 65 with periodontal disease (10), while another study  
75 found a clear association between chronic periodontitis and risk of coronary heart disease that  
76 revealed a hazard ratio of 2, independent of all other cardiovascular risk factors (6). Another  
77 study of endothelial function, a reliable indicator of vascular health, and serum inflammatory  
78 markers in middle-aged men showed improvement of vascular function after aggressive  
79 treatment of their periodontal disease (11). A 2007 meta-analysis by Bahekar *et al.* of cohort  
80 studies, case-control studies and cross-sectional studies, found that individuals with PD had  
81 between a 1.14 and 2.2 times greater risk of developing coronary heart disease (CHD) than those  
82 without PD (12).

83 PD is hypothesized to contribute to atherosclerosis in two ways. First, the pathogens  
84 causing periodontal disease may directly infect the atherosclerotic plaques. Direct studies of  
85 atherosclerotic plaques have detected the presence of *Porphyromonas gingivalis*, *Streptococcus*  
86 *sanguis*, and other major oral bacteria (13,14). However, this may represent secondary  
87 colonization of pre-existing atherosclerotic plaques at sites of turbulent flow. Some studies have  
88 also raised the possibility that bacterial invasion of the endothelium occurs and several studies  
89 have documented periodontal pathogens present in atherosclerotic plaques (15,16).

90           Second, periodontitis can lead to systemic increases in inflammatory and immune  
91 responses that can indirectly contribute to atherosclerosis (17-19). The presence of periodontitis  
92 is accompanied by a local inflammatory response, with invasion of neutrophils and lymphocytes.  
93 However, because of its chronicity, this is thought to progress to systemic inflammation, and it  
94 has been shown that patients with periodontitis have elevated levels of tumor necrosis factor-  
95 alpha (TNF $\alpha$ ), interleukin 1 beta (IL-1 $\beta$ ), C-reactive protein (CRP), interleukin 6 (IL-6), and  
96 monocyte chemoattractant protein 1 (MCP-1/CCL2) (17-19). A 17.5 years follow-up study of  
97 2549 individuals with major coronary heart disease and 3696 control subjects evaluated whether  
98 CRP and other inflammatory markers could serve as biomarkers for CHD risk. The study  
99 concluded that CRP is a moderate predictor for CHD (20). It is not clear whether the increase in  
100 inflammatory cytokines represents a response to chronic local infection or to the presence of  
101 bacteria (or bacterial fragments) circulating in the blood, but in either case, a systemic  
102 inflammatory response is initiated.

103           Atherosclerosis itself is increasingly being regarded as an inflammatory disease, and  
104 patients with other systemic inflammatory disorders such as systemic lupus erythematosus or  
105 rheumatoid arthritis have accelerated atherosclerotic disease (21-22). It seems reasonable to  
106 conclude that the systemic inflammation arising from periodontal disease would contribute to the  
107 development or progression of atherosclerosis. Magnitude of the inflammatory burden has also  
108 been shown to be related to the progression of atherosclerotic calcifications in patients with  
109 advanced disease (12,23). A study in mice by Chukkapalli *et al.* (2015) found experimental  
110 evidence connecting specific PD pathogens with both systemic inflammatory processes  
111 associated with CVD and evidence of aortic bacterial inflammation (24). The researchers  
112 infected the oral cavity of ApoE<sup>Null</sup> mice with a bacterial consortium of well-established human  
113 periodontal pathogens: *Porphyromonas gingivalis*, *Treponema denticola*, *Tannerella forsythia*  
114 and *Fusobacterium nucleatum*. An analysis of the mice over a 24-week period determined clear  
115 evidence of PD as well as increases in serum risk factors associated with atherosclerosis, a  
116 reduction in serum NO which is indicative of endothelial dysfunction, elevated serum cytokine  
117 levels, enhanced aortic plaque development, and even evidence of live bacteria inside aortic  
118 plaques (24). The researchers also reported that the combination of pathogens elicited a much  
119 stronger immune response than previous studies with single pathogens, suggesting a synergistic  
120 effect of the polymicrobial consortium.

121 In this study, we used direct DNA extraction and metagenomic sequencing to explore the  
122 relationship of periodontal biofilm bacteria to levels of systemic inflammation and vascular  
123 dysfunction in an American Indian/Alaska Native (AI/AN) population in southern California.  
124 AI/AN populations have a higher prevalence of both periodontal disease and heart disease than  
125 the general population, making the potential connection between gum disease and heart disease  
126 an important subject of study for this population. This study builds upon our previous amplicon-  
127 based 16S ribosomal RNA marker gene study, which focused solely on periodontal disease.  
128 While single-marker gene analysis is highly useful for determining species composition in  
129 microbial communities, shotgun metagenomic analysis of whole microbial communities provides  
130 more refined species and strain identification as well as insight into the functional gene  
131 composition of biofilm communities. Our results showed that the abundances of four primary  
132 periodontal pathogens associated with atherosclerosis correlated with the blood serum immune  
133 system cytokine profiles and vascular function measurements from the same participants. Our  
134 analysis also uncovered strong relationships between the relative abundance of PD pathogens  
135 and immune factors previously associated with atherosclerosis and periodontal disease, as well  
136 as Laser Doppler fluxmetry (LDF) measurements of vascular function.

137

## 138 **Materials and methods**

### 139 **Ethics Statement**

140 This study was conducted as a partnership by San Diego State University (SDSU) Institute of  
141 Public Health (IPH) and SDSU Bioscience Center. The study was approved by the SDSU and  
142 Southern California American Indian Health Center institutional review boards, and participants  
143 were enrolled after informed consent was obtained. Written informed consent was obtained from  
144 each participant. The study was registered as “Assess the Effect of Treating Periodontal Disease  
145 on Cardiovascular Function in Young Adults” on ClinicalTrials.gov under the identifier  
146 NCT01376791.

147

148

149

## 150 **Study Population**

151 American Indian/Alaska Native (AI/AN) adults age 21-40 seeking medical or dental care at a  
152 clinic in southern California were invited to participate in the study. Participants with known pre-  
153 existing heart disease conditions (hypertension, atherosclerosis, valve disease, peripheral  
154 vascular disease, history of acute myocardial infarction, or heart failure), known inflammatory  
155 conditions (autoimmune disorders, chronic infections outside the mouth) and  
156 immunosuppression (due to medication or infected HIV) were all excluded. Other exclusion  
157 criteria included: recent periodontal treatment, antibiotic use in previous three months, high  
158 blood pressure ( $> 90$ mm Hg), ongoing use of anti-inflammatory medication (other than H2  
159 blocker), statins or medications that affect periodontal status (phenytoin, calcium antagonists,  
160 cyclosporin, coumarin, heparin), and or dentition with fewer than 20 teeth. After careful  
161 assessment of the physical and dental health of the participant and consideration of the inclusion  
162 and exclusion criteria, 36 total participants with periodontitis were available for the study. Of the  
163 original 36 participants, we selected 24 total samples from 12 participants, 1 pre- and 1 post-  
164 periodontal treatment (12 participants X 2 samples = 24 total samples) to subject to shotgun  
165 metagenomic sequencing. The selection of the 12 samples was based on having an equal number  
166 of individuals having a clear response to periodontal treatment as measured by significant  
167 changes in gum pocket depth post-treatment: 6 patients improved after treatment (average  
168 periodontal pocket depth decreased) and 6 patients worsened after treatment (average periodontal  
169 pocket depth increased).

## 170 **Clinical Examination**

171 Two specially trained registered dental hygienists assessed periodontal disease status was using  
172 standardized method. Based on the periodontal pocket depth (PPD), clinical attachment loss  
173 (CAL), plaque score, and bleeding on probing (BOP), participants were classified to various  
174 degrees of periodontitis. Patients with  $PPD \leq 4$  mm,  $CAL \leq 3$  and  $BOP > 10\%$  were classified as  
175 having gingivitis. With  $PPD \geq 5$  mm,  $CAL \geq 4$  and  $BOP \geq 30\%$ , patients were classified as having  
176 mild-moderate periodontitis, and patient with  $PPD \geq 7$  mm,  $CAL \geq 6$  and  $BOP \geq 30\%$ , were  
177 classified as having severe periodontitis. Height and weight were obtained with the subject  
178 lightly clothed and without shoes. Body mass index was calculated as the ratio of weight in  
179 kilograms divided by height squared in meters ( $\text{kg}/\text{m}^2$ ). Information about medical history, health

180 behaviors and demographics were obtained from the participants using a questionnaire that was  
181 administered during an interview by research staff.

## 182 **Laboratory Analysis**

183 Blood samples were obtained by a nurse one week after enrollment to determine serum  
184 concentration of CRP, IL-6, interleukin 10 (IL-10), IL-1 $\beta$ , TNF- $\alpha$ , Interferon- $\gamma$  (IFN $\gamma$ ) and  
185 Cardiac Troponin I (cTnI). Blood was also collected to determine high-density lipoprotein  
186 (HDL), low-density lipoprotein (LDL) and total cholesterol levels. Samples were processed  
187 immediately and stored at -70°C until analyzed by commercial laboratory. Singulex Clinical  
188 Laboratory (Alameda, CA) used a Roche analyzer for CRP measurements. cTnI, IL-6, IL-10, IL-  
189 1 $\beta$ , IFN $\gamma$  and TNF- $\alpha$  were analyzed using SMC Erenna Immunoassay with single-molecule  
190 counting technology on kits 03-0092, 03-0089, 03-0056, 03-0028, 03-0049 & 03-0088  
191 respectively. Non-invasive LDF measures endothelial function reflected by microvascular  
192 vasodilation; endothelial dysfunction is considered an early predictor of atherosclerosis. Life  
193 Tech iontophoresis device was used to infuse Acetylcholine (Ach) and Sodium nitroprusside  
194 (SNP) for 10 minutes, and the microvascular vasodilation were recorded at 1, 5 and 10 minutes.  
195 Area under the curve for these LDF-recordings (SNP10 and Ach10) was integrated and  
196 expressed calibrated Amplitude Units x time, defined as the total number of blood cells passing  
197 two points 10 minutes after SNP treatment. The results from these instruments were printed,  
198 images and tracings were analyzed by technicians using appropriate software, and LDF  
199 integrated values are documented. All studies were repeated 3 months after the participants  
200 completed periodontal treatment.

## 201 **Metagenomic Sequencing and Bioinformatics**

202 PCR samples of the 12 subjects before and after treatment (total of 24 PCR samples) were  
203 submitted to the core facility at The Scripps Research Institute (TSRI) for metagenome  
204 sequencing on Illumina MiSeq. Fastq sequence files were converted to fasta format and were  
205 uploaded to MG-RAST. After performing the default sequence quality control using MG-RAST  
206 and *removing any detectable human sequence contamination*, taxonomic classification,  
207 organismal abundance and functional abundance were assigned to sequences by MG-RAST.

208 Raw sequences, MG-RAST output and study metadata are available on MG-RAST, ID number  
209 MGP15104 (<http://metagenomics.anl.gov/linkin.cgi?project=mgp15104>). Relative abundance of  
210 *Porphyromonas gingivalis*, *Fusobacterium nucleatum*, *Tannerella forsythia*, and *Treponema*  
211 *denticola* were calculated by dividing the abundance counts of individual sequences determined  
212 to belong to these four species by the total sequences in each metagenomic sample. For the  
213 statistical analyses, we used both the relative abundance of each individual pathogen and also  
214 calculated the “total abundance” for all four pathogens, which was the sum of the relative  
215 abundance of all four periodontal pathogens.

## 216 **Statistical Analysis**

217 Frequencies for all categorical variables are reported. Means and standard deviations are  
218 presented for continuous variables, and the median and interquartile ranges are reported for non-  
219 normally distributed data. Cytokines and vascular functions values had skewed distributions and  
220 were log-transformed to normalize the data. Pearson's product-moment correlations were used to  
221 determine if relative pathogen abundance correlated with cytokine, lipid and LDF measurements.  
222 Bivariate association between total relative abundance of the periodontal pathogens and each of  
223 the cytokines and vascular functions were examined using simple linear regression with 95  
224 percent confidence. Bonferroni corrections were used to adjust for multiple comparisons.  
225 Statistical analyses were performed using R (version 3.3.2) in a Jupyter notebook web interface  
226 (version 4.2.1). Log2fold analysis of MG-RAST data was performed using RStudio (version 9.4)  
227 with libraries from Bioconductor (version 3.4). The data files, Jupyter notebooks, and the R  
228 command files are included as supplemental files (S1 File).

229

## 230 **Results and discussion**

231 Table 1 details the general characteristics of the population whose periodontal biofilms were  
232 analyzed in this study. Our metagenomic analysis of serum cytokines and periodontal pathogens  
233 uncovered a statistically significant relationship between the relative abundance of four primary  
234 periodontal pathogens and IL-1 $\beta$  (Pearson correlation;  $r=0.64$ ,  $p=0.0008$ ,  $p(\text{adj})=0.006$ ; Table 2).  
235 We also discovered a positive relationship with IFN $\gamma$ , but the association was not significant post



236 correction ( $r=0.42$ ,  $p=0.039$ ,  $p(\text{adj})=0.27$ ; Table 2). These findings are somewhat in contrast to  
 237 the correlations between cytokine levels and measure of PPD in a parallel study of the same  
 238 population. Delange et al. (*in review*) found an association between PPD and the blood level  
 239 cytokine concentration of CRP and IL-6 although these were not significant after adjusting for  
 240 possible confounders. The strong correlation between pathogenic members of the periodontal  
 241 biofilm and IL-1 $\beta$  cytokine levels suggests that a more targeted focus on specific members of  
 242 periodontal pocket biofilms and their relationship to the immune response could more directly  
 243 connect periodontal disease and heart health.

244 **Table 1.** Population characteristics.

| <b>Characteristics</b>               | <b>n(%)<sup>a</sup></b> |
|--------------------------------------|-------------------------|
| <b>Periodontal Status</b>            |                         |
| Severe                               | 4 (33.3%)               |
| Moderate                             | 5 (41.7%)               |
| None/Mild                            | 3 (25.0 %)              |
| <b>Gender</b>                        |                         |
| Male                                 | 6 (50%)                 |
| Female                               | 6 (50%)                 |
| <b>Characteristics</b>               |                         |
| <b>Mean(SD)</b>                      |                         |
| Age, yrs                             | 28.8 (6.9)              |
| BMI <sup>b</sup> , kg/m <sup>2</sup> | 30.7 (7.5)              |
| <b>Cytokines</b>                     |                         |
| <b>Median(SD)</b>                    |                         |
| CRP (mg/L)                           | 3.7 (9.4)               |
| cTnI (pg/mL)                         | 0.6 (0.9)               |
| TNF $\alpha$ (pg/mL)                 | 2.0 (0.9)               |
| IL-10 (pg/mL)                        | 1.8 (0.6)               |
| IL-6 (pg/mL)                         | 1.4 (1.0)               |
| IFN $\gamma$ (pg/mL)                 | 0.2 (0.2)               |
| IL-1 $\beta$ (pg/mL)                 | 0.2 (0.2)               |
| <b>Lipid Profile</b>                 |                         |
| <b>Mean (SD)</b>                     |                         |
| HDL                                  | 193.7 (43.8)            |
| LDL                                  | 46.5 (13.8)             |
| CHOL                                 | 109.3 (39.5)            |
| TRI                                  | 164.2 (105.9)           |
| <b>Median (IQR)</b>                  |                         |
| SNP 10                               | 43309.7 (30059.3)       |
| ACh 10                               | 72965.7 (85331.8)       |
| <b>Mean(SD)</b>                      |                         |
| SNP 10                               | 24983.1 (11910.7)       |
| ACh 10                               | 95053.9 (67601.9)       |

245 General characteristics of the population subset analyzed in this study.

246 <sup>a</sup> Results from 6 Males, 6 Females were combined pre- and post- treatment for Means, Medians  
247 and SDs.

248 <sup>b</sup> BMI=Body Mass Index.

249

250 **Table 2. Correlations between periodontal pathogens and cytokine levels.**

| <b>Biomarker</b> | <b>r</b> | <b>p-value</b> | <b>p-value (adj)<sup>a</sup></b> |
|------------------|----------|----------------|----------------------------------|
| CRP              | 0.03     | 0.88           | 1.0                              |
| cTnI             | 0.37     | 0.07           | 0.84                             |
| TNF $\alpha$     | 0.11     | 0.61           | 1.0                              |
| IL-10            | 0.08     | 0.71           | 1.0                              |
| IL-6             | 0.09     | 0.69           | 1.0                              |
| IL-1 $\beta$     | 0.64     | 0.0008**       | 0.006**                          |
| IFN $\gamma$     | 0.42     | 0.039*         | 0.27                             |

251 Pearson's product-moment correlations of total relative abundance of four periodontal pathogens  
252 (ln-transformed) with cytokines measurements (ln-transformed).

253 <sup>a</sup> P-value (adj) Bonferroni corrected for multiple comparisons.

254 \*  $p < .05$ , \*\* $p < .01$ .

255

256

257 The positive correlation between the periodontal pathogens and high IL-1 $\beta$  is consistent  
258 with the apparent role of this cytokine in PD. IL-1 $\beta$  is known to play a critical role in stimulating  
259 bone resorption in the later stages of periodontal disease (25,26) (bone loss through resorption  
260 happens in the final stages of severe periodontitis) and a study of adults with periodontal disease  
261 found higher average concentration of IL-1 $\beta$  in patients with severe periodontal disease than in  
262 those with a healthy periodontium (27). Furthermore, the connection between periodontal  
263 disease and CVD, particularly atherosclerosis, via serum IL-1 $\beta$  appears to have significant  
264 support in the literature. Several previous studies have strongly associated IL-1 $\beta$  levels with  
265 cardiac health, and even indicated a mechanistic link in animal models. A 2003 population-based  
266 study of 1,292 subjects, found IL-1 $\beta$  level to be four times higher in subjects diagnosed with  
267 congestive health failure (28). A study in mice also evaluated the effect of IL-1 $\beta$  on formation of  
268 atherosclerosis and determined that IL-1 $\beta$  promoted atherosclerosis (29). Other animal studies  
269 have shown that deleting or inhibiting IL-1 signaling (either by administration of exogenous IL-  
270 1 $\beta$  or by blocking IL-1Ra) reduced formation and progression of atherosclerotic plaques,  
271 strongly indicating a mechanistic link (30,31).

272 Bivariate analysis determined that, of the four pathogens, the relative abundance of *F.*  
273 *nucleatum* had the strongest relationship to blood serum IL-1 $\beta$  levels (Table 3). This is congruent

274 with previous research on periodontal disease which specifically identified *F. nucleatum* as a  
275 strong stimulator of neutrophil secretion of IL-1 $\beta$  (32,33). Our results, in combination with the  
276 animal model studies and the periodontal research, indicate this organism contributes to both  
277 periodontal disease and inflammatory processes associated with vascular dysfunction.

278

279 **Table 3. Associations of specific periodontal pathogens and IL-1 $\beta$ .**

| Abundance                       | Coefficient | Std. Error | t     | P- Value (adj) <sup>a</sup> |
|---------------------------------|-------------|------------|-------|-----------------------------|
| <i>Porphyromonas gingivalis</i> | 0.25        | 0.22       | 1.12  | 0.28                        |
| <i>Tannerella forsythia</i>     | 0.04        | 0.18       | 0.21  | 0.84                        |
| <i>Treponema denticola</i>      | -0.02       | 0.12       | -0.19 | 0.85                        |
| <i>Fusobacterium nucleatum</i>  | 0.33        | 0.16       | 2.0   | 0.05                        |

280 Bivariate Analysis of relative abundances of individual pathogens (ln-transformed) with IL-1 $\beta$   
281 measurements (ln-transformed).

282 <sup>a</sup> P-value (adj) Bonferroni corrected for multiple comparisons.

283

284 A weak correlation was detected between blood cholesterol (CHOL) levels and total  
285 relative periodontal pathogen abundance, but the adjusted p-value was not significant (Table 4).  
286 No significant correlations were found with other blood lipid profiles. These results agree with a  
287 case-control study which evaluated the relationship between periodontitis and serum lipid profile  
288 in 60 patients, 30 with and 30 without chronic periodontitis (34). Blood serum levels of total  
289 cholesterol, triglycerides (TRI), HDL and LDL were measured in both groups and there was no  
290 significant difference in any measure of blood serum lipid concentration.

291

292 **Table 4. Correlations between periodontal pathogens with lipid profile measurements.**

| Lipid Profile | r    | P-value | P- Value (adj) <sup>a</sup> |
|---------------|------|---------|-----------------------------|
| CHOL          | 0.44 | 0.03*   | 0.39                        |
| HDL           | 0.08 | 0.71    | 1.0                         |
| LDL           | 0.29 | 0.79    | 1.0                         |

293 Pearson's product-moment correlation of total relative abundance of four periodontal pathogens  
294 (ln-transformed) with lipid profile measurements (ln-transformed).

295 <sup>a</sup> P-value (adj) Bonferroni corrected for multiple comparisons.

296 \* p < .05.

297

298

299 Table 5 shows the relationship between direct LDF vascular function measurements and  
300 total relative abundance of periodontal pathogens. A strong and significant relationship was

301 found between total relative pathogen abundance and LDF measures of blood flow volume after  
302 10 minutes of Sodium Nitroprusside (SNP) treatment ( $p=0.0005$ ). The SNP10 value is an  
303 estimate of the total number of blood cells passing between two points 10 minutes after SNP  
304 treatment. The values after 1 minute and 5 minutes were also negatively correlated (data not  
305 shown). Interestingly, there was no correlation with Acetylcholine (Ach) treatment. We are not  
306 clear why this did not mirror the SNP result, though we note that Ach stimulates the release of  
307 endogenous nitric oxide, while SNP is based on the addition of an exogenous nitric oxide source.  
308 Although any given measure of vascular function is not without controversy, our data are  
309 consistent with a relationship of relative periodontal pathogen load and poorer vascular function.  
310

311 **Table 5. Correlations between periodontal pathogens with LDF measurements.**

| LDF measurements | r     | P-value  | P-value (adj) <sup>a</sup> |
|------------------|-------|----------|----------------------------|
| SNP10            | -0.65 | 0.0005** | 0.0065**                   |
| Ach10            | 0.06  | 0.79     | 1.0                        |

315 Pearson's product-moment correlation for total relative abundance of four periodontal pathogens  
316 (ln-transformed) with LDF measurements.

317 <sup>a</sup> P-value (adj) Bonferroni corrected for multiple comparisons.

318 \*\* $p < .01$ .

319

320 Metagenomics analysis also allows the opportunity to investigate the gene functional  
321 diversity of microbial communities per se, and the relationship of gene functional pathways to  
322 inflammation or disease. Given the strong association of total relative pathogen abundance to IL-  
323  $1\beta$  levels, we asked whether the abundances of any given gene pathway differed significantly  
324 between the periodontal pocket microbiomes of individuals with high IL- $1\beta$  levels and those  
325 with low IL- $1\beta$  levels. Fig 1 shows the results of a fold change ( $\log_2$ ) analysis based on  
326 estimated relative abundances of functional gene pathways. Over 40 different function categories  
327 differed between the microbiomes of individuals with high and low IL- $1\beta$ . The bacteria in  
328 individuals with low IL- $1\beta$  tended to be more abundant in genes involved in metabolism and  
329 biosynthesis. The bacterial communities in high IL- $1\beta$  individuals, on the other hand, were richer  
330 in degradation (Histidine) and cell death pathways.

331

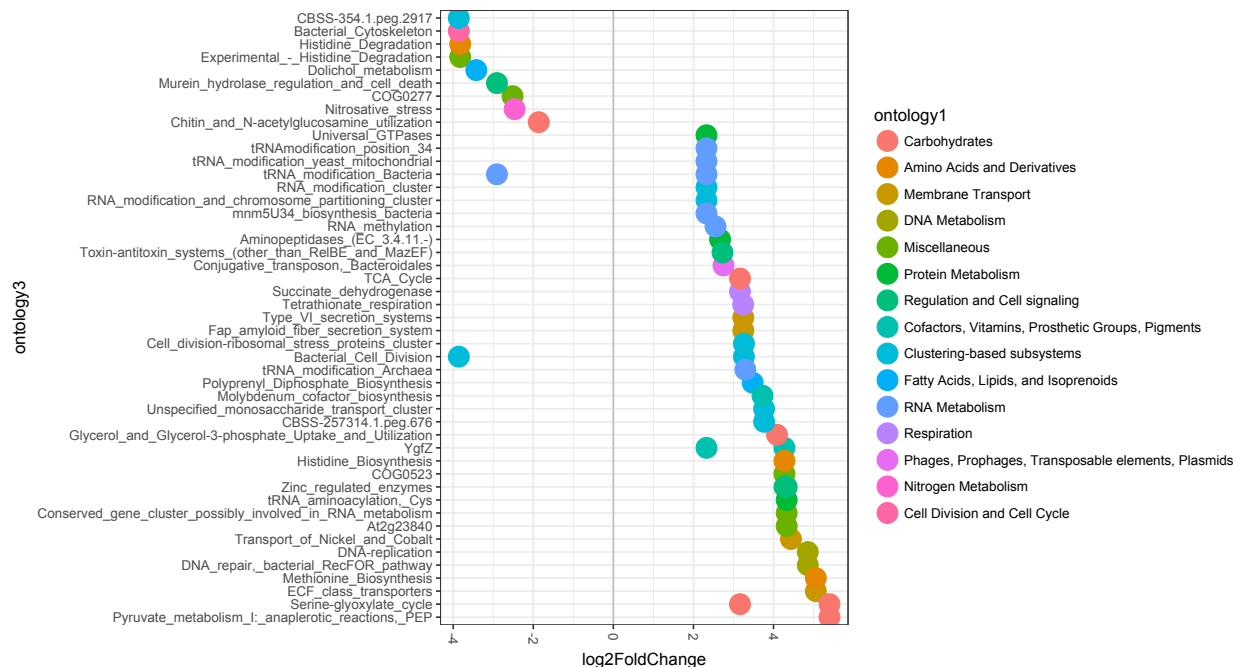

332

333 **Fig 1. Plot showing log<sub>2</sub> fold-change values (x-axis) by gene functional categories.** The  
 334 relative abundance is significantly different (adjusted  $P < 0.05$ ,  $> \text{two-fold}$  change) between  
 335 patients with ‘normal’ ( $< 0.10$ ) and ‘abnormal’ ( $> 0.10$ ) serum IL-1 $\beta$  levels. The relative  
 336 abundances were estimated by matching the metagenomic sequence to the SEED gene function  
 337 database using MG-RAST. The left-hand side indicates gene categories significantly more  
 338 abundant in individuals with ‘abnormal’ serum IL-1 $\beta$  levels compared with ‘normal’, while the  
 339 right side indicates the reverse.

340

341 Particularly noteworthy was the higher relative abundance of genes associated with  
 342 nitrosative stress enzymes. These genes are directly involved in the reduction of Nitric Oxide  
 343 (NO) free radicals. NO is used as a toxic defense against infectious organisms and regulates the  
 344 growth and activity of inflammatory cells such as macrophages (35). Nitric oxide is involved in  
 345 host defense and nitrosative stress has been established as a biomarker in the inflammatory and  
 346 immune response (36,37). Studies have shown the biofilm in the periodontal disease has the  
 347 capability to convert nitrate in the oral cavity to nitrite, which in turn is denitrified to nitric oxide  
 348 (36). A 2009 study of 60 periodontitis subjects measured the NO levels in serum and found  
 349 elevated levels of nitrite in periodontitis subjects compared to healthy subjects; Menaka *et al.*  
 350 further described that NO presence reflects bone resorption leading to disease progression (36).  
 351 Thus, the higher relative abundance of nitrosative stress enzymes in the biofilm of patients with  
 352 higher IL-1 $\beta$  is consistent with the research showing *F. nucleatum* stimulates IL-1 $\beta$  and NO  
 353 production.

## 354 **Conclusions**

355 The results of our metagenomic and vascular function study provide evidence of a relationship in  
356 young adults between periodontal disease and specific measures of vascular dysfunction. The  
357 connection with specific members of the pathogenic oral community, particularly *Fusobacterium*  
358 *nucleatum*, corresponds well with previous human and mouse model studies and suggests a  
359 possible causal relationship between periodontitis and vascular dysfunction predisposing to  
360 atherosclerotic heart disease. While the connections appear robust, the sample size of our study is  
361 relatively modest. With the decrease in costs associated with high-throughput sequencing and  
362 cytokine analyses, much larger studies will be possible. Also, a study over a longer timeframe  
363 should allow greater opportunity for resolution of periodontitis and subsequent changes in  
364 measures of CVD. In the future, larger studies should be carried out with a full panel of  
365 metagenomics, serum and gingival crevicular cytokine analyses and CVD measurements over a  
366 longer time frame. These findings establish a clear relationship between the periodontal  
367 pathogen *F. nucleatum* and IL-1 $\beta$ , which has been shown to contribute significantly to heart  
368 disease. This study was conducted in adults under age 40 and suggests that decades of exposure  
369 to inflammatory cytokines contributes to life-threatening heart disease. Further study is needed to  
370 show that heart disease progression can be delayed with appropriate oral hygiene.

371

## 372 **Acknowledgements**

373

374 We would like to thank the staff at the American Indian/Alaska Native (AIAN) population clinic,  
375 specifically to the medical, dental and administrative staff for their hard work and dedication. We  
376 also thank Rosalin Le for help coordinating sample collections and performing LDF  
377 measurements. We also thank the many willing participants in this study. This study was funded  
378 by a grant from the National Institutes of Health.

379

380

## 381 References

- 382
- 383 1. Assuma R, Oates T, Cochran D, Amar S, Graves DT. IL-1 and TNF Antagonists Inhibit  
384 the Inflammatory Response and Bone Loss in Experimental Periodontitis. *J Immunol.*  
385 1998;160(1). Available from: <http://www.jimmunol.org/content/160/1/403.short>
  - 386 2. Jakubovics N, Kolenbrander P. The road to ruin: the formation of disease-associated oral  
387 biofilms. *Oral Dis.* 2010 Nov;16(8):729–39. Available from:  
388 <http://doi.wiley.com/10.1111/j.1601-0825.2010.01701.x>
  - 389 3. Bao K, Belibasakis GN, Thurnheer T, Aduse-Opoku J, Curtis MA, Bostanci N. Role of  
390 *Porphyromonas gingivalis* gingipains in multi-species biofilm formation. *BMC Microbiol.*  
391 2014 Oct 2;14(1):258. Available from:  
392 <http://bmcmicrobiol.biomedcentral.com/articles/10.1186/s12866-014-0258-7>
  - 393 4. Kumar PS, Griffen AL, Moeschberger ML, Leys EJ. Identification of candidate  
394 periodontal pathogens and beneficial species by quantitative 16S clonal analysis. *J Clin*  
395 *Microbiol.* 2005 Aug 1;43(8):3944–55. Available from:  
396 <http://jcm.asm.org/cgi/doi/10.1128/JCM.43.8.3944-3955.2005>
  - 397 5. Ludwig DS, Pereira MA, Kroenke CH, Hilner JE, Van Horn L, Slattery ML, et al. Dietary  
398 fiber, weight gain, and cardiovascular disease risk factors in young adults. *JAMA.* 1999  
399 Oct 27;282(16):1539–46. Available from:  
400 <http://www.ncbi.nlm.nih.gov/pubmed/10546693>
  - 401 6. Hujoel PP, Drangsholt M, Spiekerman C, DeRouen TA. Periodontal disease and coronary  
402 heart disease risk. *JAMA.* 2000 Sep 20;284(11):1406–10. Available from:  
403 <http://www.ncbi.nlm.nih.gov/pubmed/10989403>
  - 404 7. Joshipura KJ, Rimm EB, Douglass CW, Trichopoulos D, Ascherio A, Willett WC. Poor  
405 Oral Health and Coronary Heart Disease. *J Dent Res.* 1996 Sep 1;75(9):1631–6. Available  
406 from: <http://jdr.sagepub.com/cgi/doi/10.1177/00220345960750090301>
  - 407 8. Morrison HI, Ellison LF, Taylor GW. Periodontal Disease and Risk of Fatal Coronary  
408 Heart and Cerebrovascular Diseases. *Eur J Cardiovasc Risk.* 1999 Feb 1;6(1):7–11.  
409 Available from: <http://cpr.sagepub.com/lookup/doi/10.1177/204748739900600102>
  - 410 9. Howell TH, Ridker PM, Ajani UA, Hennekens CH, Christen WG. Periodontal disease and  
411 risk of subsequent cardiovascular disease in U.S. male physicians. *J Am Coll Cardiol.*  
412 2001 Feb;37(2):445–50. Available from: <http://www.ncbi.nlm.nih.gov/pubmed/11216961>
  - 413 10. Genco R, Offenbacher S, Beck J. Periodontal disease and cardiovascular disease:  
414 epidemiology and possible mechanisms. *J Am Dent Assoc.* 2002 Jun;133 Suppl:14S–22S.  
415 Available from: <http://www.ncbi.nlm.nih.gov/pubmed/12085720>
  - 416 11. Tonetti MS, D’Aiuto F, Nibali L, Donald A, Storry C, Parkar M, et al. Treatment of  
417 periodontitis and endothelial function. *N Engl J Med.* 2007 Mar 1;356(9):911–20.  
418 Available from: <http://www.nejm.org/doi/abs/10.1056/NEJMoa063186>
  - 419 12. Bahekar AA, Singh S, Saha S, Molnar J, Arora R. The prevalence and incidence of  
420 coronary heart disease is significantly increased in periodontitis: A meta-analysis. *Am*  
421 *Heart J.* 2007 Nov;154(5):830–7. Available from:  
422 <http://www.ncbi.nlm.nih.gov/pubmed/17967586>
  - 423 13. Chiu B. Multiple infections in carotid atherosclerotic plaques. *Am Heart J.* 1999  
424 Nov;138(5 Pt 2):S534-6. Available from: <http://www.ncbi.nlm.nih.gov/pubmed/10539867>
  - 425 14. Saito A, Inagaki S, Kimizuka R, Okuda K, Hosaka Y, Nakagawa T, et al. *Fusobacterium*

- 426 *nucleatum* enhances invasion of human gingival epithelial and aortic endothelial cells by  
427 *Porphyromonas gingivalis*. FEMS Immunol Med Microbiol. 2008 Dec;54(3):349–55.  
428 Available from: [https://academic.oup.com/femspd/article-lookup/doi/10.1111/j.1574-](https://academic.oup.com/femspd/article-lookup/doi/10.1111/j.1574-695X.2008.00481.x)  
429 [695X.2008.00481.x](https://academic.oup.com/femspd/article-lookup/doi/10.1111/j.1574-695X.2008.00481.x)
- 430 15. Liuba P, Karnani P, Pesonen E, Paakkari I, Forslid A, Johansson L, et al. Endothelial  
431 dysfunction after repeated *Chlamydia pneumoniae* infection in apolipoprotein E-knockout  
432 mice. Circulation. 2000 Aug 29;102(9):1039–44. Available from:  
433 <http://www.ncbi.nlm.nih.gov/pubmed/10961970>
- 434 16. Didion SP. *Chlamydothila pneumoniae* and endothelial activation: the smoke that  
435 precedes the fire of atherosclerosis? Circ Res. 2008 Apr 25;102(8):861–3. Available from:  
436 <http://circres.ahajournals.org/cgi/doi/10.1161/CIRCRESAHA.108.175547>
- 437 17. Schenkein HA, Loos BG. Inflammatory mechanisms linking periodontal diseases to  
438 cardiovascular diseases. J Periodontol. 2013 Apr;84(4-s):S51–69. Available from:  
439 <http://www.ncbi.nlm.nih.gov/pubmed/23631584>
- 440 18. O’Connor S, Taylor C, Campbell LA, Epstein S, Libby P. Potential infectious etiologies  
441 of atherosclerosis: a multifactorial perspective. Emerg Infect Dis. 2001 Oct;7(5):780–8.  
442 Available from: [http://wwwnc.cdc.gov/eid/article/7/5/01-0503\\_article.htm](http://wwwnc.cdc.gov/eid/article/7/5/01-0503_article.htm)
- 443 19. Van Dyke TE, van Winkelhoff AJ. Infection and inflammatory mechanisms. J Clin  
444 Periodontol. 2013 Apr;40:S1–7. Available from:  
445 <http://www.ncbi.nlm.nih.gov/pubmed/23627321>
- 446 20. Danesh J, Wheeler JG, Hirschfield GM, Eda S, Eiriksdottir G, Rumley A, et al. C-  
447 Reactive Protein and Other Circulating Markers of Inflammation in the Prediction of  
448 Coronary Heart Disease. N Engl J Med. 2004 Apr 1;350(14):1387–97. Available from:  
449 <http://www.ncbi.nlm.nih.gov/pubmed/15070788>
- 450 21. Cavagna L, Boffini N, Cagnotto G, Inverardi F, Grosso V, Caporali R. Atherosclerosis  
451 and Rheumatoid Arthritis: More Than a Simple Association. Mediators Inflamm.  
452 2012;2012:1–8. Available from: <http://www.ncbi.nlm.nih.gov/pubmed/23024462>
- 453 22. Skeoch S, Cristinacce PLH, Williams H, Pemberton P, Xu D, Sun J, et al. Imaging  
454 atherosclerosis in rheumatoid arthritis: evidence for increased prevalence, altered  
455 phenotype and a link between systemic and localised plaque inflammation. Sci Rep. 2017  
456 Dec 11;7(1):827. Available from: <http://www.ncbi.nlm.nih.gov/pubmed/28400572>
- 457 23. Crowson CS, Liao KP, Davis JM, Solomon DH, Matteson EL, Knutson KL, et al.  
458 Rheumatoid arthritis and cardiovascular disease. Am Heart J. 2013 Oct;166(4):622–  
459 628.e1. Available from: <http://www.ncbi.nlm.nih.gov/pubmed/24093840>
- 460 24. Chukkapalli SS, Velsko IM, Rivera-Kweh MF, Zheng D, Lucas AR, Kesavalu L.  
461 Polymicrobial Oral Infection with Four Periodontal Bacteria Orchestrates a Distinct  
462 Inflammatory Response and Atherosclerosis in ApoE null Mice. Amar S, editor. PLoS  
463 One. 2015 Nov 30;10(11):e0143291. Available from:  
464 <http://dx.plos.org/10.1371/journal.pone.0143291>
- 465 25. Lee Y-M, Fujikado N, Manaka H, Yasuda H, Iwakura Y. IL-1 plays an important role in  
466 the bone metabolism under physiological conditions. Int Immunol. 2010 Oct  
467 1;22(10):805–16. Available from: [https://academic.oup.com/intimm/article-](https://academic.oup.com/intimm/article-lookup/doi/10.1093/intimm/dxq431)  
468 [lookup/doi/10.1093/intimm/dxq431](https://academic.oup.com/intimm/article-lookup/doi/10.1093/intimm/dxq431)
- 469 26. Dewhirst FE, Stashenko PP, Mole JE, Tsurumachi T. Purification and partial sequence of  
470 human osteoclast-activating factor: identity with interleukin 1 beta. J Immunol. 1985  
471 Oct;135(4):2562–8. Available from: <http://www.ncbi.nlm.nih.gov/pubmed/3875658>



- 472 27. Hönig J, Rordorf-Adam C, Siegmund C, Wiedemann W, Erard F. Increased interleukin-1  
473 beta (IL-1 beta) concentration in gingival tissue from periodontitis patients. *J Periodontal*  
474 *Res.* 1989 Nov;24(6):362–7. Available from:  
475 <http://www.ncbi.nlm.nih.gov/pubmed/2531790>
- 476 28. Di Iorio A, Ferrucci L, Sparvieri E, Cherubini A, Volpato S, Corsi A, et al. Serum IL-  
477 1beta levels in health and disease: a population-based study. “The InCHIANTI study”.  
478 *Cytokine.* 2003 Jun 21;22(6):198–205. Available from:  
479 <http://www.ncbi.nlm.nih.gov/pubmed/12890453>
- 480 29. Kirii H, Niwa T, Yamada Y, Wada H, Saito K, Iwakura Y, et al. Lack of interleukin-1beta  
481 decreases the severity of atherosclerosis in ApoE-deficient mice. *Arterioscler Thromb*  
482 *Vasc Biol.* 2003 Apr 1;23(4):656–60. Available from:  
483 <http://atvb.ahajournals.org/cgi/doi/10.1161/01.ATV.0000064374.15232.C3>
- 484 30. Isoda K, Sawada S, Ishigami N, Matsuki T, Miyazaki K, Kusuhara M, et al. Lack of  
485 interleukin-1 receptor antagonist modulates plaque composition in apolipoprotein E-  
486 deficient mice. *Arterioscler Thromb Vasc Biol.* 2004 Jun 4;24(6):1068–73. Available  
487 from: <http://atvb.ahajournals.org/cgi/doi/10.1161/01.ATV.0000127025.48140.a3>
- 488 31. Chamberlain J, Evans D, King A, Dewberry R, Dower S, Crossman D, et al. Interleukin-  
489 1beta and signaling of interleukin-1 in vascular wall and circulating cells modulates the  
490 extent of neointima formation in mice. *Am J Pathol.* 2006 Apr;168(4):1396–403.  
491 Available from: <http://www.ncbi.nlm.nih.gov/pubmed/16565512>
- 492 32. Yoshimura A, Hara Y, Kaneko T, Kato I. Secretion of IL-1 beta, TNF-alpha, IL-8 and IL-  
493 1ra by human polymorphonuclear leukocytes in response to lipopolysaccharides from  
494 periodontopathic bacteria. *J Periodontal Res.* 1997 Apr;32(3):279–86. Available from:  
495 <http://www.ncbi.nlm.nih.gov/pubmed/9138193>
- 496 33. Sheikhi M, Gustafsson A, Jarstrand C. Cytokine, elastase and oxygen radical release by  
497 *Fusobacterium nucleatum*-activated leukocytes: a possible pathogenic factor in  
498 periodontitis. *J Clin Periodontol.* 2000 Oct;27(10):758–62. Available from:  
499 <http://www.ncbi.nlm.nih.gov/pubmed/11034124>
- 500 34. Hamissi J, Shahsavarani MT, Hamissi H. A Comparison of Serum Lipid Profile between  
501 Periodontitis Patients and Healthy Individuals. *Iran Red Crescent Med J.* 2011  
502 Apr;13(4):283–4. Available from: <http://www.ncbi.nlm.nih.gov/pubmed/22737481>
- 503 35. Coleman JW. Nitric oxide in immunity and inflammation. *Int Immunopharmacol.* 2001  
504 Aug;1(8):1397–406. Available from: <http://www.ncbi.nlm.nih.gov/pubmed/11515807>
- 505 36. Menaka KB, Ramesh A, Thomas B, Kumari NS. Estimation of nitric oxide as an  
506 inflammatory marker in periodontitis. *J Indian Soc Periodontol.* 2009 May;13(2):75–8.  
507 Available from: <http://www.jisponline.com/text.asp?2009/13/2/75/55842>
- 508 37. Pacher P, Schulz R, Liaudet L, Szabó C. Nitrosative stress and pharmacological  
509 modulation of heart failure. *Trends Pharmacol Sci.* 2005 Jun;26(6):302–10. Available  
510 from: <http://www.ncbi.nlm.nih.gov/pubmed/15925705>

511

512

513 **Supporting Information**

514

515 **S1 File. Data and analysis files.** Compressed collection of data files and analysis scripts used to  
516 generate the results of the study.
